# Supplementary material for: Unraveling the complexities of Last Glacial Maximum climate: the role of individual boundary conditions and forcings
Source: Copernicus journal article supplement (doi:10.5194/cp-2023-51), 2023-07-10
Supplement: Supplementary file 1 [file cp-2023-51-supplement.pdf]

## Supplementary Materials

470 Contents:

Fig. S1 Spatial resolution of the ocean model FESOM. Units are km.

Fig. S2 Top-of-atmosphere insolation anomalies between LGM and PI. Units are  $W/m^2$

Fig. S3 Patterns of AMOC in LGM (a) and LGM\_I (b), and their differences (c). Units are Sv.

475 Fig. S4 Anomalies in DJF-mean 1,000 hPa zonal winds between LGM and LGM\_I. The marked area has a significance level of greater than 95% based on Student's t-test. Units are m/s.

Fig. S5 Anomalies in 925 hPa specific humidity for (a) LGM-PI, (b) LGM-LGM\_G, (c) LGM-LGM\_I, and (d) LGM-LGM\_GI. Units are kg/kg.

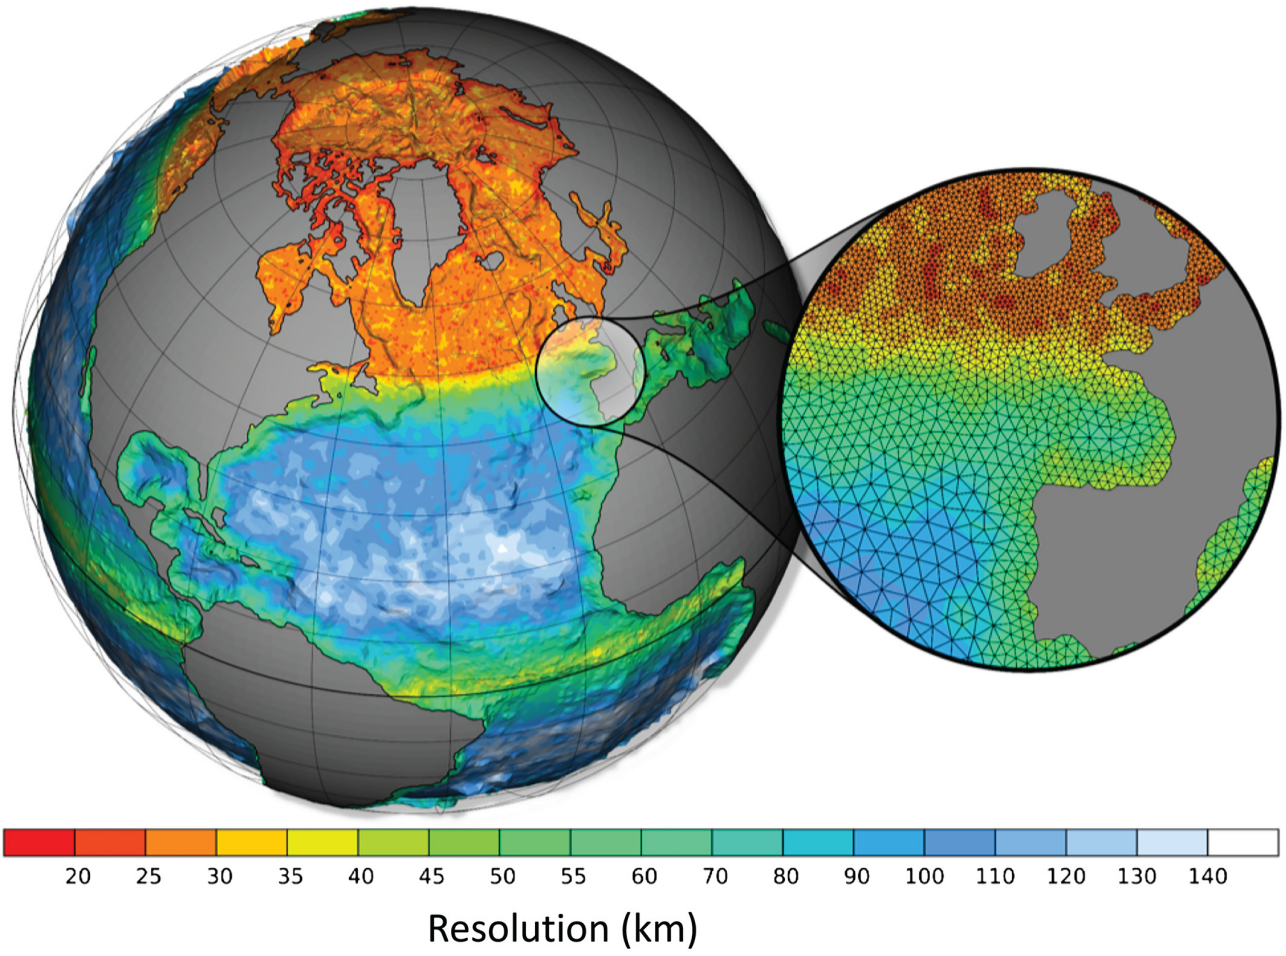

**Figure S1.** Spatial resolution of the ocean model FESOM. Units are km.

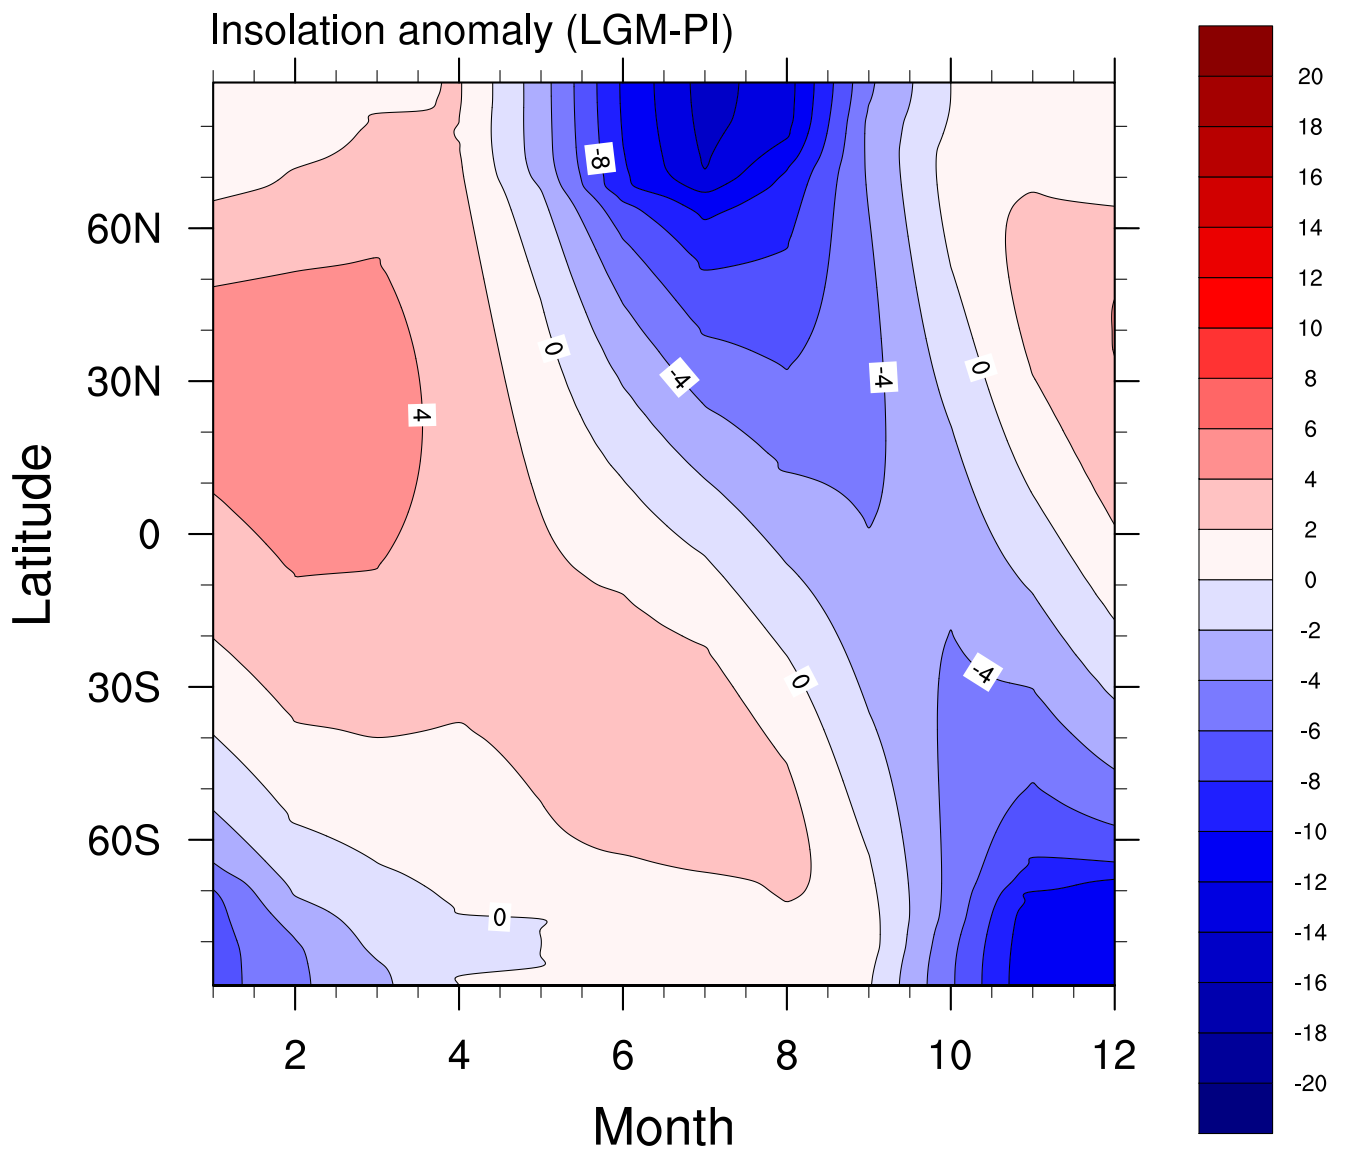

**Figure S2.** Top-of-atmosphere insolation anomalies between LGM and PI. Units are  $W/m^2$

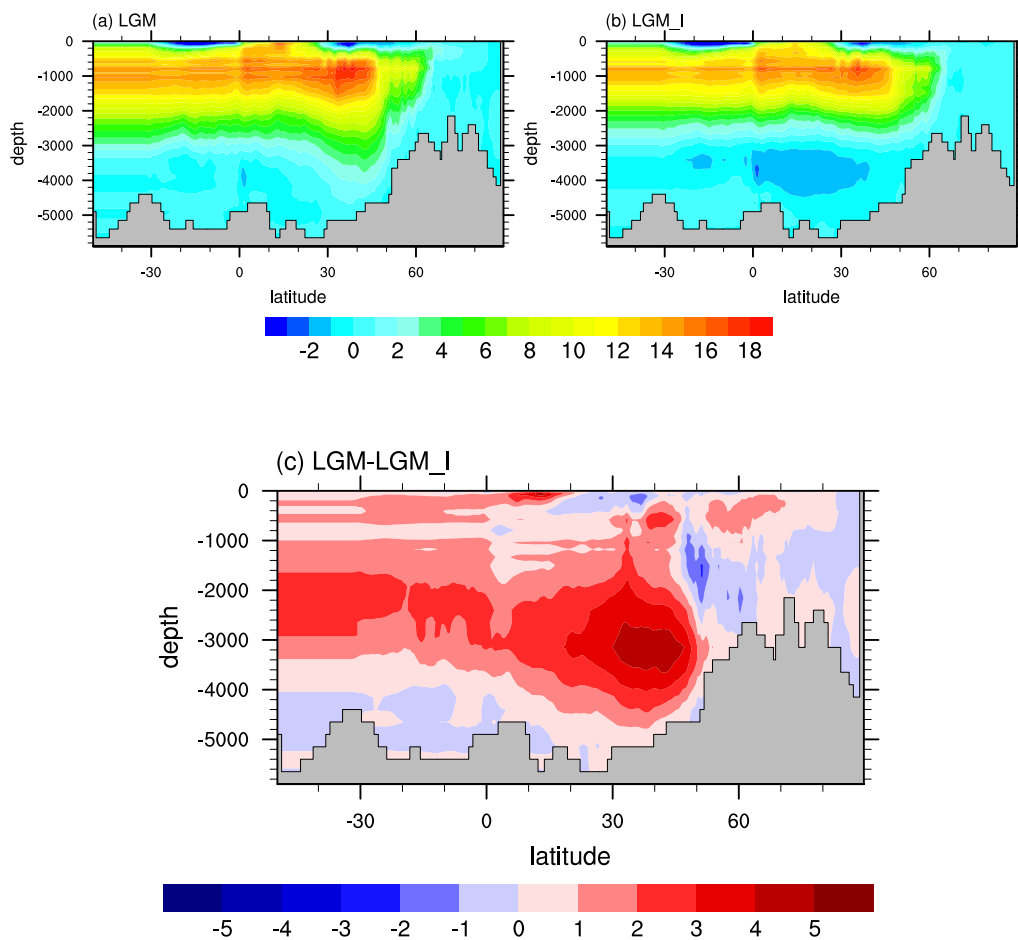

**Figure S3.** Patterns of AMOC in LGM (a) and LGM\_I (b), and their differences (c). Units are Sv.

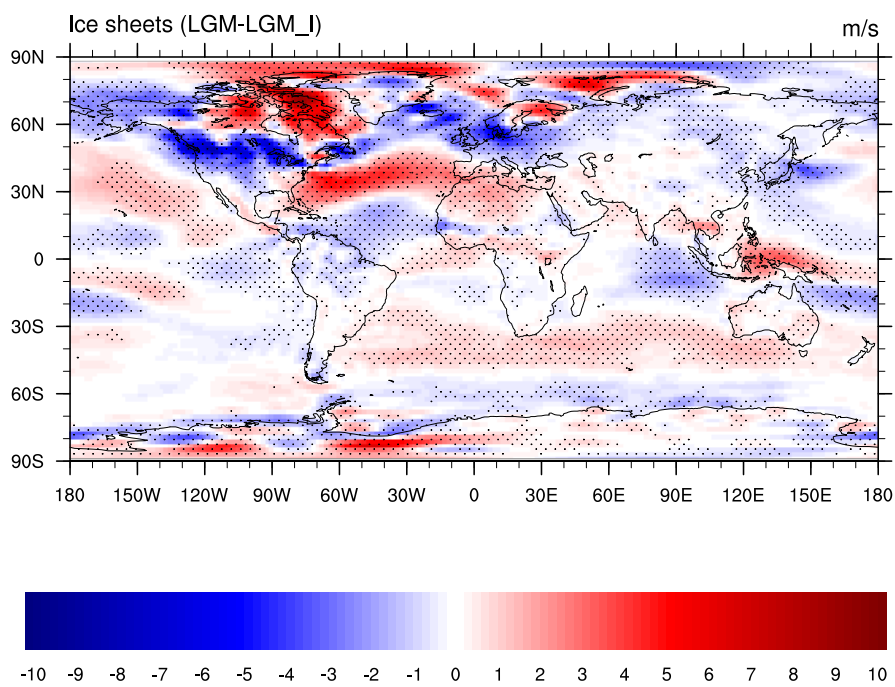

**Figure S4.** Anomalies in DJF-mean 1,000 hPa zonal winds between LGM and LGM\_I. The marked area has a significance level of greater than 95% based on Student's t-test. Units are m/s.

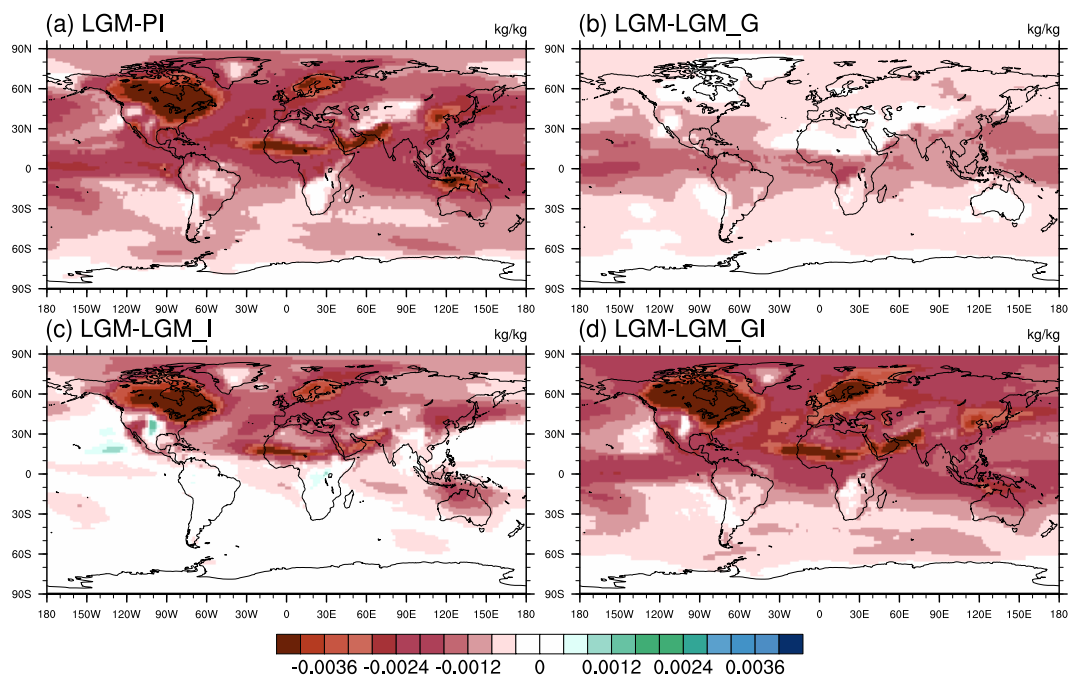

**Figure S5.** Anomalies in 925 hPa specific humidity for (a) LGM-PI, (b) LGM-LGM\_G, (c) LGM-LGM\_I, and (d) LGM-LGM\_GI. Units are kg/kg.
